# Supplementary material for: Toxicity of Asciminib in Real Clinical Practice: Analysis of Side Effects and Cross-Toxicity with Tyrosine Kinase Inhibitors
Source: MDPI journal article supplement (doi:10.3390/cancers15041045), 2023-02-07
Supplement: s1 [file s1]

## Supplementary Material

|                                 | Frequencies of AEs        |                                 |                         | Cross-Intolerance analysis                              |                                                         |                                                         |                                                         |
|---------------------------------|---------------------------|---------------------------------|-------------------------|---------------------------------------------------------|---------------------------------------------------------|---------------------------------------------------------|---------------------------------------------------------|
|                                 | Total<br>(n=77),<br>n (%) | Non-<br>PPT<br>(n=51),<br>n (%) | PTT<br>(n=26),<br>n (%) | Non-PTT(n=51), %                                        |                                                         | PTT (n=26), %                                           |                                                         |
|                                 |                           |                                 |                         | Frequency<br>in patients<br>with that<br>previous<br>AE | Frequency<br>in patients<br>without that<br>previous AE | Frequency<br>in patients<br>with that<br>previous<br>AE | Frequency<br>in patients<br>without that<br>previous AE |
| Thrombocytopenia                | 13<br>(16.9)              | 8<br>(15.7)                     | 5<br>(19.2)             | 53.3%                                                   | 0%                                                      | 30.8%                                                   | 7.7%                                                    |
| Anemia                          | 9<br>(11.7)               | 6<br>(11.8)                     | 3<br>(11.5)             | 25%                                                     | 3.2%                                                    | 16.7%                                                   | 7.1%                                                    |
| Neutropenia                     | 5<br>(6.5)                | 2<br>(3.9)                      | 3<br>(11.5)             | 11.1%                                                   | 2.4%                                                    | 30%                                                     | 0%                                                      |
| Fatigue                         | 14<br>(18.2)              | 10<br>(19.6)                    | 4<br>(15.3)             | 33.3%                                                   | 15.4%                                                   | 37.5%                                                   | 5.5%                                                    |
| Arthralgias                     | 9<br>(11.7)               | 7<br>(13.7)                     | 2<br>(7.7)              | 28.6%                                                   | 8.1%                                                    | 12.5%                                                   | 5.5%                                                    |
| Nausea                          | 6 (7.8)                   | 4 (7.8)                         | 2 (7.7)                 | 15.4%                                                   | 5.2%                                                    | 11.1%                                                   | 5.9%                                                    |
| Pleural/pericardial<br>effusion | 4 (5.2)                   | 3 (5.9)                         | 1 (3.8)                 | 10%                                                     | 3.2%                                                    | 11.1%                                                   | 0%                                                      |
| Pancreatitis                    | 2 (2.6)                   | 1 (1.9)                         | 1 (3.8)                 | 33%                                                     | 0%                                                      | 33%                                                     | 0%                                                      |

**Table S1.** Adverse effects and cross-intolerance comparison between ponatinib pretreated patients and non-ponatinib pretreated patients.

AE: adverse effects. PTT: Ponatinib pretreated patients.
